1     **Functionally non-redundant paralogs *spe-47* and *spe-50* encode FB-MO**  
2                     **associated proteins and interact with *him-8***

3  
4  
5  
6  
7

8     Jessica N. Clark, Gaurav Prajapati, Fermina Aldaco, Thomas J. Sokolich, Steven Keung,

9     Sarojani Austin, Ángel A. Valdés, and Craig W. LaMunyon\*

10  
11

12     Department of Biological Sciences, Cal Poly Pomona, Pomona, California, United States of  
13     America

14

15     \*Corresponding author

16     email: [cwlamunyon@cpp.edu](mailto:cwlamunyon@cpp.edu)

17

## 18 **Abstract**

19           The activation of *C. elegans* spermatids to crawling spermatozoa is affected by a number  
20 of genes including *spe-47*. Here, we investigate a paralog to *spe-47*: *spe-50*, which has a highly  
21 conserved sequence and expression, but which is not functionally redundant to *spe-47*.  
22 Phylogenetic analysis indicates that the duplication event that produced the paralogs occurred  
23 prior to the radiation of the *Caenorhabditis* species included in the analysis, allowing a long  
24 period for the paralogs to diverge in function. Furthermore, we observed that knockout  
25 mutations in both genes, either alone or together, have little effect on sperm function. However,  
26 hermaphrodites harboring both knockout mutations combined with a third mutation in the *him-8*  
27 gene are nearly self-sterile due to a sperm defect, even though they have numerous apparently  
28 normal sperm within their spermathecae. We suggest that the sperm in these triple mutants are  
29 defective in fusing with oocytes, and that the effect of the *him-8* mutation is due to its role in  
30 chromatin remodeling.

## 31 **Introduction**

32           Sperm cells generally face a brief life of intense competition to realize their goal of  
33 fertilizing an oocyte. To have success, they must execute with extreme efficiency. They  
34 must activate at precisely the right moment, locomote with haste using chemotaxis to guide  
35 them to the fertilization site, and fuse with an oocyte as quickly as possible. All this is  
36 required of a cell stripped of its ability to express its genome, in most cases surviving only  
37 on the meager stores within its tiny volume. Given the unusual nature of sperm cells, it is  
38 not surprising that well in excess of 1,000 genes are specific to, or upregulated in, sperm  
39 development [1, 2].

40 Our studies are concerned with the activation of sperm from the nematode *C.*  
41 *elegans*. Spherical and immotile, *C. elegans* spermatids are so primed to activate that they  
42 require the activity of SPE-6 to remain in the spermatid stage [3]. Once a signal is received,  
43 the spermatids undergo rapid wholesale cellular reorganization that involves an influx of  
44 cations [4], a brief elevation in pH [5], the release of intracellular Ca<sup>2+</sup> [6-8], induction of a  
45 MAPK cascade [9], and polymerization of major sperm protein (MSP) and fusion of the  
46 membranous organelles (MOs) with the plasma membrane [7]. As a result, a pseudopod is  
47 extended and motility is achieved through MSP mediated pseudopodal treadmilling [10].

48 As the first step in the life of a *C. elegans* sperm cell, activation (spermiogenesis) may  
49 be initiated via two redundant pathways. One pathway, utilized only in males, involves the  
50 extracellular signaling serine protease TRY-5, which is secreted with the seminal fluid [11]  
51 and activates the spermatid. TRY-5 interacts with the transporter protein SNF-10 to  
52 stimulate activation [12]. The second pathway present in both males and hermaphrodites  
53 proceeds through the SPE-8 group proteins, namely, SPE-8, SPE-12, SPE-19, SPE-27, SPE-  
54 29 [reviewed in 13], and the most recent addition, SPE-43 [14]. It is thought that these  
55 proteins are anchored to the plasma membrane and transduce the activation signal inward,  
56 perhaps through the non-receptor tyrosine kinase SPE-8, which appears to move inward,  
57 away from the plasma membrane, during activation [15].

58 Our focus has been on discovering the identities of a collection of mutations  
59 recovered from a suppressor screen of *spe-27(it132ts)* [3]. Mutant *spe-27* hermaphrodites  
60 are sterile because their self-sperm do not activate. The suppressor mutations restore  
61 varying degrees of fertility due to the fact that they cause sperm to activate prematurely  
62 without the need for activation signal transduction. We have identified *spe-27(it132ts)*

63 suppressor mutations in *spe-4(hc196)* [16], *spe-46(hc197)* [17], and *spe-47(hc198)* [18].  
64 There is a paralog to *spe-47* in the *C. elegans* genome with the sequence identifier  
65 Y48B6A.5. Here, we report that this paralog is a new sperm gene designated *spe-50*, but it  
66 is not functionally redundant to *spe-47*. However, knockouts of the two genes have an  
67 unusual genetic interaction with *him-8* when combined in a triple mutant strain.

## 68 **Methods**

### 69 **Worm strains and handling**

70 All *C. elegans* strains were maintained on *Escherichia coli* OP50-seeded Nematode  
71 Growth Media (NGM) agar plates [19]. The *Caenorhabditis* Genetic Center kindly provided  
72 the following strains: N2, BA963: *spe-27(it132ts) IV*, BA966: *spe-27(it132ts) unc-22(e66) IV*,  
73 CB1489: *him-8(e1489) IV*, DR466: *him-5(e1490) V*, BA17: *fem-1(hc17ts) IV*, JK654: *fem-*  
74 *3(q23ts) IV*, EG5767: *qqI7 I; oxSi78 II; unc-119(ed3) III*, and SP444 *unc-4(e120) spe-*  
75 *7(mn252)/mnC1 [dpy-10(e128) unc-52(e444)] II*. Strain IE4488 harboring the *ttTi4488*  
76 Mos1 transposon insertion in Y48B6A.5 was received from the NEMAGENETAG consortium  
77 [20], and the transposon insertion was homozygosed to create strain ZQ117. Steven  
78 L'Hernault kindly provided BA771 *spe-18(hc133)/mnC1 [dpy-10(e128) unc-52(e444)] II*.  
79 Other strains were created by combining alleles. Brood size was measured by counting the  
80 progeny laid daily by hermaphrodites isolated in 35 mm petri dishes. In some cases, the  
81 effect of mating on hermaphrodite fertility was assessed, in which case individual  
82 hermaphrodites were maintained with four males each.

83 **RT-PCR**

84 To perform RT-PCR, RNA was extracted from mixed-age populations of worms.  
85 Large populations of each strain were collected and rinsed 4 times with M9 buffer. After  
86 freezing at -80 °C, the worms were disrupted by sonication in TRI reagent, and the RNA  
87 was extracted using the Direct-zol™ RNA purification kit following the manufacturer's  
88 protocol for DNase I digestion (Zymo Research). cDNA was synthesized with Maxima  
89 Reverse Transcriptase (Thermo Scientific™) and oligo(dT)18 primer (#SO131 Thermo  
90 Scientific™). cDNAs were adjusted to give the same concentration across samples prior to  
91 PCR amplification. A 536 bp region of *spe-50* cDNA was amplified from exons 3 and 4 with  
92 primers that flank the *ttTi4488* Mos1 insertion site (Forward primer: 5'-  
93 TTGACTTCTGTGCCTCCAGC -3'; Reverse primer: 5'-GGTTCAACAGATTCTTCCTCAAGTGG-  
94 3'). To determine if gene expression was upregulated in sperm, we multiplexed *spe-50*  
95 specific primers with primers that amplify an 898 bp region of the transcript of *act-2*, the *C.*  
96 *elegans* ortholog of  $\beta$ -Actin (Forward primer: 5'-GTATGGGACAGAAAGACTCG-3'; Reverse  
97 primer: 5'-ATAGATCCTCCGATCCAGAC-3'). The primers spanned intronic regions to  
98 distinguish between products from genomic DNA and cDNA. To determine if the *ttTi4488*  
99 Mos1 transposon insertion disrupted *spe-50* transcription, we compared RT-PCR from a  
100 population of *spe-50(ttTi4488)* with that from an N2 population. To determine if the *spe-50*  
101 transcript is upregulated in sperm, we compared RT-PCR products from populations of  
102 *fem-3(q23ts)*, hermaphrodites of which make only sperm, with products from *fem-*  
103 *1(hc13ts)*, hermaphrodites of which make only oocytes.

## 104 **CRISPR/Cas9-induced mutations**

105 To induce specific mutations, we utilized the co-conversion strategy for  
106 CRISPR/Cas9 mediated gene edits [21]. Briefly, this strategy induces the dominant *cn64*  
107 mutation in the *dpy-10* gene in addition to the desired gene-specific edit. F1 worms  
108 heterozygous for *cn64* roll while they crawl and are more likely to also harbor the desired  
109 edit than do non-rollers [21]. Our two specific edits were accomplished by different  
110 methods. To create a mutation that replicates the *spe-47(hc198)* amino acid substitution in  
111 *spe-50*, we utilized the expression vector pDD162, which has both a single guide RNA  
112 (sgRNA) backbone and the Cas9 gene for *C. elegans* expression [22] (obtained from  
113 Addgene). The *spe-50* target sequence (5'-GATCTTGTTACAGTTCCAT-3') was chosen using  
114 a CRISPR guide-finding feature in Geneious R11 (<https://www.geneious.com>) based upon a  
115 high predicted on-target activity [23] and a low likelihood of off-target activity. The  
116 targeting sequence was inserted into the sgRNA cassette of pDD162 using the Q5® Site-  
117 Directed Mutagenesis Kit (New England BioLabs, Inc.), resulting in identical plasmids  
118 (pTS11 and pTS12).

119 To make the specific *spe-50* edit at the Cas9-induced double-stranded break, we  
120 designed an asymmetric ssDNA repair oligonucleotide having 34 bases upstream and 60  
121 bases downstream of the beginning of the PAM site [24]. The oligo had a two-base pair  
122 (bp) substitution that changed the Asn at position 314 to Ile, a second silent substitution  
123 that created a TaqI restriction site, and a third silent substitution that disrupted the PAM  
124 site (Fig. 1C). The *dpy-10* co-conversion edit was accomplished with pDD162 derivative  
125 plasmids (pTS5 and pTS6) harboring the *dpy-10* guide. The ssDNA repair oligo to induce  
126 the *dpy-10(cn64)* dominant mutation was as described in ARRIBERE *et al.* [21]. The *spe-50*

127 and *dpy-10* CRISPR/Cas9 plasmids and repair oligos were injected into the gonads of N2  
128 hermaphrodites.

129 A knockout mutation that affects both isoforms of *spe-47* was accomplished with the  
130 Alt-R™ CRISPR/Cas9 components (Integrated DNA Technologies™) for *in vitro* assembled  
131 Cas9-crRNA-tracrRNA ribonucleoproteins (RNPs) following the protocol of KOHLER *et al.*  
132 [25]. The *spe-47* target sequence was chosen using the CRISPR guide-finding feature in  
133 Geneious R11 (5'-AGTTGCCAGTGACTCCAACA-3'). A specific *spe-47* edit that affects both  
134 spliced isoforms was designed into an ssDNA repair oligo. The oligo consisted of 55 bp  
135 upstream and 58 bp downstream of the beginning of the PAM site. The oligo had an altered  
136 sequence that disrupted five of the six bp just upstream of the PAM site, induced an NheI  
137 site that created an in frame stop codon, and inserted one bp to shift the reading frame (Fig.  
138 1).

139 To induce the *spe-47* knockout, we incubated equimolar solutions of our target-  
140 specific crRNAs (for both *spe-47* and *dpy-10*) and standard tracrRNA (100 μM each) in IDT  
141 Nuclease-Free Duplex Buffer at 95 °C for 5 minutes followed by 5 minutes at room  
142 temperature. The RNA duplex and Cas9-NLS were combined for a final concentration of 27  
143 μM each and incubated at room temperature for 5 minutes to form the final  
144 ribonucleoprotein (RNP). We injected worm gonads with a mixture of 17.5 μM RNP and 6  
145 μM ssDNA repair template for *spe-47* along with 0.5 μM ssDNA repair template for *dpy-10*.

146 To recover the *spe-50* edit, 38 F1 rolling *cn64/+* worms were recovered and isolated.  
147 After laying eggs, the F1 worms placed in tubes; their DNA was then extracted and used as  
148 template in 5 μl PCR reactions with primers that flank the edit site (Forward primer: 5'-  
149 CATCAAGGGTGGACTTCTCG-3'; Reverse primer: 5'-AGCAGCAATGAGATGAGTGTCC-3'). To

150 the completed PCR reactions, we added 5  $\mu$ l containing restriction enzyme buffer and 5  
151 units of TaqI. After an hour of incubation, the components were run on agarose gels to  
152 determine if the edit was induced. Of the 38 F1 rollers isolated, four appeared to have the  
153 edit via their restriction digested PCR products. Only one of them was pursued, and it  
154 contained the correct alteration of base pairs (Fig 1).

155

156 **Fig 1. Comparison of *spe-47* and *spe-50* sequences.** (A) Exonic structure of *spe-47* and  
157 its paralog *spe-50*. Shown are the locations of sequence variants for these genes. (B)  
158 Alignment of the SPE-47 and SPE-50 protein sequences. Darker background indicates  
159 greater similarity, and mutations are shown in red. Near the carboxy terminus a line with  
160 open arrows indicates the partial MSP domain, where the open arrows correspond to the  
161 seven  $\beta$  strands present in *A. suum* MSP- $\alpha$ . Note that the MSP domains are truncated at the  
162 carboxy terminus, missing the segment indicated by the downward bend in the MSP  
163 marker line. Also, the region encoded by the *spe-47* isoform B is indicated by the green line.  
164 (C) Two mutations created in this study. The original gene sequence is shown above with  
165 the edited mRNA sequence below. The *zq27* mutation created in *spe-47* creates a stop  
166 codon (underlined in red) within an NheI restriction enzyme site for detection and a 1 bp  
167 insertion to shift the reading frame. The *zq26* mutation in *spe-50* induced an Asn to Ile  
168 mutation in the position corresponding the *hc198* mutation in *spe-47*. Sequencing traces  
169 shown confirmation that the sequences were edited in the mutant strains.

170

171 For *spe-47*, after injecting the constituted CRISPR/Cas9 RNPs, we found no F1  
172 rollers. We combined three non-rolling F1s per petri dish in eight dishes, and extracted



173 their combined DNA for PCR/restriction analysis as previously described. One plate  
174 appeared to harbor a mutant. After isolating 24 offspring from this plate, we recovered a  
175 single worm that was homozygous for the edit (Fig 1). These mutations were designated  
176 *spe-50(zq26)* and *spe-47(zq27)*.

### 177 **Construction of a *spe-50* translational reporter**

178 We created an N-terminal mCherry translational reporter construct for *spe-50*  
179 following the MosSCI technique [26, 27]. The mCherry sequence, amplified without its stop  
180 codon from plasmid pCFJ104 (Addgene), was placed directly downstream of 1,714 bp of  
181 the *spe-50* promoter sequence and was followed by the *spe-50* genomic sequence and 448  
182 bp of the 3' UTR. All worm sequences were amplified from N2 DNA, and all PCR was  
183 performed with Phusion High Fidelity DNA Polymerase (Thermo Scientific). The sequences  
184 were amplified with PCR primers engineered with regions of ~20 bp overlap, enabling us  
185 to join them together following the PCR fusion technique described by Hobert [28]. The  
186 final fusion was cloned into the multiple cloning site of the vector pCFJ352, which targets  
187 the *ttTi4348* Mos1 insertion on Chromosome I for homologous recombination.

### 188 **Microscopy, in vitro sperm activation, and microinjection transformation**

189 Imaging was accomplished on a Nikon C2 confocal microscope also outfitted for  
190 Nomarski DIC and widefield epifluorescence. Widefield images were captured on a Nikon  
191 DS-Qi1 12 bit monochrome camera. Images were acquired and analyzed with Nikon NIS-  
192 Elements imaging software. All worms were dissected in SM1 buffer[29], and nuclear  
193 material was labeled with 30 ng/μl Hoechst 33342 in SM1 for live cells and with 20 ng/μl  
194 DAPI in PBS for fixed and permeabilized cells. Sperm were activated *in vitro* by exposure to

195 SM1 containing 200 µg/ml Pronase. Imaging of reporter constructs was kept constant  
196 across experiments to reduce error (e.g. the laser power and gain were used for each  
197 fluorophore/fluorescent label). Compounds were microinjected into the gonads of  
198 recipient young adult hermaphrodites using a Nikon Eclipse Ti inverted microscope  
199 outfitted for Nomarski DIC.

## 200 **Phylogenetic analysis**

201 In order to estimate the evolutionary relationships of the SPE-50 homologous  
202 proteins and detect gene duplication events, we conducted a phylogenetic analysis using 15  
203 protein sequences from 7 species of *Caenorhabditis*, with the protein OVOC10046 of  
204 *Onchocerca volvulus* as the outgroup. The analysis was run in MrBayes 3.2.6 [30] with the  
205 GTR + I model and two runs of six chains for 10 million repetitions, with a sampling  
206 interval of 1,000 repetitions and burn-in of 25%.

## 207 **Results**

### 208 ***spe-50* is a sperm gene and overlaps in expression with *spe-47***

209 When we first discovered that *spe-47* harbored the *hc198* mutation that suppressed  
210 *spe-27(it132ts)* sterility by inducing premature spermatid activation [18], we became  
211 aware that there was a closely-related paralog present in the genome: Y48B6A.5 (Fig 1  
212 A&B). The SPE-47 and SPE-50 proteins exhibit a high degree of sequence conservation,  
213 with both having an N-terminus of unknown function and a C-terminal MSP domain that  
214 lacks the final  $\beta$  strand (Fig 1 B). To determine if Y48B6A.5 expression is upregulated in  
215 sperm, we performed differential RT-PCR. The Y48B6A.5 transcript is abundant in *fem-*  
216 *3(q23)* mutant hermaphrodites (Fig 2); these worms produce only spermatids but are

217 otherwise somatically hermaphrodites. Alternatively, the transcript is nearly absent in  
218 *fem-1(hc13ts)* hermaphrodites that produce only oocytes. This pattern is characteristic of  
219 sperm genes.

220

221 **Fig 2. RT-PCR results for the *spe-50* transcript.** Primers specific for the Y48B6A.5  
222 transcript amplified a robust product in *fem-3(q23ts)* hermaphrodites that produce only  
223 sperm, but such a product was nearly absent amplifying from *fem-1(hc13ts)*  
224 hermaphrodites that produce only oocytes. The *spe-50* transcript was also present in the  
225 N2 strain but not in the *spe-50(ttTi4488)* mutant that has the Mos1 transposon insertion in  
226 Exon 3. Had the transcript with the Mos1 transposon been amplified, it would have been  
227 1,829 bp in length, and the extension time was designed to allow a product that large to be  
228 amplified. The PCR reactions also had primers for *act-2*, the *C. elegans*  $\beta$ -actin gene. The  
229 *act-2* product demonstrates that there was equivalent mRNA present in the samples. MW  
230 is the molecular weight marker: Phage lambda DNA digested with PstI.

231

232         There are two sperm genes mapped to the region of Y48B6A.5: *spe-7* [31] and *spe-18*  
233 (Steven L'Hernault, personal communication). In order to test whether Y48B6A.5 is  
234 actually one of the two nearby genes, we conducted complementation tests using the strain  
235 ZQ117 with the *ttTi4488* Mos1 transposon insertion in Y48B6A.5. This insertion disrupts  
236 Y48B6A.5 and results in the absence of a transcript (Fig 2). Hermaphrodites homozygous  
237 for mutations in *spe-7(mn252)* and *spe-18(hc133)* are sterile due to primary spermatocytes  
238 that arrest in Meiosis I [31; Steven L'Hernault, personal communication]. Males from the  
239 *ttTi4488* bearing strain were crossed with sterile *unc-4 spe-7* mutant hermaphrodites or

240 with sterile *spe-18* mutant hermaphrodites. The F1 hermaphrodites were isolated at 25 °C  
241 and their progeny counted. The F1 hermaphrodites had wild-type fertility: for *spe-7*, F1  
242 fertility = 198 progeny (n=10, SEM=14.4), and for *spe-18*, F1 fertility = 190 progeny (n=12,  
243 SEM=9.3). Thus, the *ttTi4488* strain complemented both *spe-7* and *spe-18* because it  
244 carried wild-type alleles of both. Y48B6A.5 is a new sperm gene and was given the  
245 designation *spe-50* (Steven L'Hernault, personal communication).

246 To examine SPE-50 protein localization, we created an N-terminal translational  
247 reporter with mCherry via the mosSCI protocol [26, 27]. The mosSCI process inserts the  
248 reporter into specific chromosomal locations, allowing us to combine the *spe-50::mCherry*  
249 reporter with a *spe-47::GFP* reporter we created earlier [18] in a double reporter strain.  
250 Imaging of male gonads showed that SPE-50::mCherry colocalizes almost completely with  
251 SPE-47::GFP (Fig 3A). Both appear as small puncta surrounding nuclei that are entering  
252 the pachytene stage. The puncta enlarge and expand to fill the cells as they mature into  
253 primary spermatocytes. Both also then disappear as the secondary spermatocytes form  
254 with the spermatids being completely devoid of the reporters. No such fluorescence was  
255 found in males lacking the reporters (Fig 3B).

256

257 **Fig 3. Localization of SPE-50::mCherry and SPE-47::GFP translational reporters in**  
258 **male gonads.** The fluorescent images are 3D reconstructions of a stack of images. (A) The  
259 double reporter strain constructs and imaging in blue (nuclei), green (*spe-47::GFP*), and red  
260 (*spe-50::mCherry*). A region of the gonad in the merge image shown by the box is enlarged  
261 to give better detail of the localization. In this enlargement, only the middle of the 3D  
262 reconstruction is shown to give better understanding of colocalization. (B) Imaging from

263 the unlabeled wild-type strain for comparison. In both the reporter images and the wild-  
264 type control, there are remnants of the intestine present. The intestine is highly  
265 autofluorescent in green and red.

266

267 The colocalization of the two reporters in space and time suggested that these  
268 proteins are involved in the same cellular processes. We tested this hypothesis by  
269 examining mutations in both genes. The *spe-47* gene was discovered in a suppressor  
270 screen of *spe-27(it132ts)*. The *spe-27* mutation causes hermaphrodite sterility because the  
271 self-spermatids are unresponsive to the signal to activate [32]. The *spe-47(hc198)*  
272 mutation recovered from the screen causes some spermatids to activate precociously  
273 without the need for an activation signal, overcoming the sterility of *spe-27(it132ts)* (Fig 4)  
274 [18]. If SPE-50 is functionally redundant to SPE-47, then a mutation similar to *hc198* in *spe-*  
275 *50* should also result in precocious spermatid activation. Fig 1B shows the location of the  
276 amino acid changed by *spe-47(hc198)*: an isoleucine to asparagine substitution in the  $\alpha_2$   $\beta$ -  
277 strand of the MSP domain. Using CRISPER/Cas9, we induced the same amino acid change  
278 in *spe-50* by creating the *zq26* mutation. In addition to altering the two base pairs that  
279 cause the amino acid change, we made two other silent substitutions: one that created a  
280 TaqI restriction site to allow detection of the alteration, and the other that altered the PAM  
281 site to eliminate further Cas9 activity (Fig 1C). Interestingly, the *spe-50(zq26)* mutation did  
282 not suppress *spe-27(it132ts)* sterility (Fig 4). In fact, there was no fertility deficit  
283 associated with the *spe-50(zq26)* mutation, while *spe-47(hc198)* causes a significant  
284 reduction in fertility due to problems with sperm function (Fig 4) [18]. When both *spe-*  
285 *47(hc198)* and *spe-50(zq26)* were combined in the same strain, the fertility was nearly

286 identical to that of *spe-47(hc198)* alone (Fig 4). Thus, in terms of function, the two genes  
287 are not identical.

288

289 **Fig 4. Suppression of *spe-27(it132ts)* sterility.** *spe-27(it132ts)* mutants are sterile at 25  
290 °C, but they regain some fertility if they are also homozygous for the *spe-47(hc198)*  
291 mutation. On its own, the *hc198* mutation results in a loss of fertility compared to wild type  
292 (N2). Conversely, the *spe-50(zq26)* mutation, which encodes the equivalent amino acid  
293 change as *hc198*, is entirely fertile on its own and does not suppress *spe-27(it132ts)*  
294 sterility. A strain with both *hc198* and *zq26* has approximately the same fertility as *hc198*  
295 on its own. Thus, the *spe-50(zq26)* mutation has no apparent effect on fertility.

296

297 We also examined knockout alleles of the two genes (Fig 1). Even though the *spe-*  
298 *50(ttTi4488)* transposon insertion disrupts *spe-50*, it had essentially no effect on fertility  
299 (Fig 5). In our previous study of *spe-47*, we created a knockout allele, *spe-47(zq19)* (Fig  
300 1A), which caused only a slight reduction in fertility [18]. In the interim, a second isoform  
301 of the *spe-47* transcript, which is unaffected by the *spe-47(zq19)* mutation, was identified.  
302 To ensure that we disabled both isoforms, we inserted a stop codon and frame-shift in the  
303 fifth exon common to both isoforms to create a new knockout allele: *spe-47(zq27)* (Fig 1A  
304 and 1C). This new mutation also had little effect on fertility (Fig 5). Combining both *spe-*  
305 *50(ttTi4488)* and *spe-47(zq27)* mutations in the same strain of worms had only a modest  
306 effect on fertility, reducing it to just over 100 self-progeny per worm (Fig 5). Thus, these  
307 genes are not essential to spermatogenesis, but they do seem to have an interaction that  
308 reduces fertility when both gene products are absent.

309

310 **Fig. 5. Fertility associated with *spe-47* and *spe-50* knockout mutations and *him***

311 **mutant backgrounds.** In the top set of bars, the two knockout mutations are compared to  
312 N2 both alone and combined in the same strain. In the middle set of bars, the various  
313 knockout and *spe-27* suppressor mutations are combined with *him-8(e1489)*. Both *spe-47*  
314 mutations in a *spe-50* knockout and *him-8* knockout background resulted in a drastic  
315 reduction of fertility. This reduction was due to a defect in sperm, because mating the  
316 strain to *him-8* males restored full fertility. In the bottom set of bars, combining the  
317 knockout mutations with *him-5* did not have a drastic reduction in fertility.

318

319 In creating strains, we noticed that combining the *him-8(e1489)* mutation with the  
320 two knockout mutations had a more profound effect on fertility (Fig 5). Combining either  
321 knockout alone with *him-8(e1489)* did not reduce fertility more than what we found in the  
322 *him-8(e1489)* strain alone. It was only when both knockouts were present in the *him-8*  
323 background that fertility was reduced approximately 15 progeny per hermaphrodite (Fig  
324 5). This fertility deficit was due to self-sperm dysfunction, as mating these hermaphrodites  
325 to *him-8(e1489)* males increased their fertility greatly (Fig 5). Interestingly, combining the  
326 *spe-27*-suppressor mutation *spe-47(hc198)* with *spe-50(ttTi4488)* in a *him-8(e1489)*  
327 background lead to a similar drop in fertility. The same was not true when we combined  
328 the *spe-47(zq27)* knockout mutation with the *spe-27*-suppressor-like mutation *spe-*  
329 *50(zq26)* in a *him-8(e1489)* strain: the fertility was much higher (Fig 5). There was no  
330 similar fertility deficit associated with *him-5*. The triple *spe-47(zq27); spe-50(ttTi4488);*  
331 *him-5(e1490)* mutant hermaphrodites laid in excess of 50 offspring (Fig 5), indicating that

332 the interaction with *him-8* is not due just to X Chromosome non-disjunction problems  
333 common to both *him-5* and *him-8* mutants.

334         If the two knockout mutations in a *him-8(e1489)* background (the triple mutant)  
335 have defective sperm, then we might expect to see some defects in the sperm themselves.  
336 Of 145 sperm dissected from seven triple mutant males, all appeared as normal spermatids  
337 (Table I). This is similar to 162 sperm we dissected from five *him-8(e1489)* virgin males:  
338 all were spermatids. Because *him-8* has a role in X-Chromosome pairing and synapsis [33],  
339 we also looked for gross abnormalities in sperm nuclei. The vast majority of sperm from  
340 triple mutants had normal nuclei, similar to what we found for sperm from *him-8(e1489)*  
341 single mutants (Table I). Alternatively, spermatids from triple mutants could have  
342 defective activation, so we exposed spermatids to the *in vitro* activator Pronase [5, 34].  
343 Sperm from triple mutants kept at 25 °C activated at a slightly but significantly reduced  
344 rate (88.5%) compared with sperm from *him-8(e1489)* mutants (96.3%) (Table I), although  
345 this does not seem a large enough effect to explain the fertility deficit in this strain. Finally,  
346 we looked at the sperm remaining in hermaphrodites one day after being transferred as  
347 L4s from 20 °C to 25 °C. The triple mutants had fewer sperm remaining in each gonad arm  
348 (mean = 31.7, SEM = 5.9, n = 21 gonad arms) than did *him-8* mutants (mean = 73.5, SEM =  
349 6.9, n = 14 gonad arms), a significant difference ( $t=4.88$ ,  $P<0.001$ ). Again, this does not  
350 explain the small number of fertilized eggs produced by the triple mutants, because the  
351 number of sperm cells remaining per gonad arm is greater than the number of progeny  
352 produced by the triple mutants. In most instances, the sperm in the triple mutants were in  
353 or very near the spermatheca, while in others some sperm were well away from the  
354 spermatheca, being scattered in the uterus, as if they were unable to remain localized in



355 their target organ. Thus, overall there were more sperm remaining within triple mutants  
356 than the number of fertilized eggs they produce, suggesting that these sperm are unable to  
357 fertilize oocytes.

358

359 **Table I: Sperm activation and nuclear anatomy.**

| Male dissected in | Sperm morphology |             | Nuclear anatomy |      |        |
|-------------------|------------------|-------------|-----------------|------|--------|
|                   | Spermatids       | Spermatozoa | Normal          | Tiny | Double |
| SM1 buffer        |                  |             |                 |      |        |
| Triple mutant     | 145              | 0           | 141             | 2    | 2      |
| <i>him-8</i>      | 162              | 0           | 159             | 1    | 2      |
| SM1 + Pronase*    |                  |             |                 |      |        |
| Triple mutant     | 15               | 116         |                 |      |        |
| <i>him-8</i>      | 6                | 154         |                 |      |        |

360 Sperm phenotypes were examined in the triple mutant, *spe-47(zq27); spe-50(ttTi4488);*  
361 *him-8(e1489)* with *him-8(e1489)* as the control. In SM1 buffer alone, dissected virgin males  
362 release only inactive spermatids. In 200 µg/ml Pronase in SM1, spermatids activate to  
363 crawling spermatozoa. The gross anatomy of sperm nuclei was examined in the worms  
364 dissected in SM1, which also contained nuclear label Hoechst 33342 at 20µg/ml. \*A G-test  
365 of independence was performed on the data from Pronase activation:  $P=0.011$ ;  $G=6.456$ .

366

367 We examined the phylogeny of *spe-50* and *spe-47* by comparing their protein  
368 products to those from closely related species. The evolutionary analysis in Fig 6 shows  
369 that the SPE-50 protein is clearly more closely related to orthologous proteins in the genus  
370 than to its paralog-encoded SPE-47. Indeed, the hypothetical duplication of the ancestral  
371 coding sequence must have taken place prior to the radiation of the species examined.

372

373 **Fig 6. Evolutionary relationship of the SPE-50 homologous proteins.** The proteins  
374 were identified from a BLASTP search of the NCBI non-redundant protein sequence  
375 database. For each protein, the accession number is listed before the slash, and the  
376 WormBase identifier after the slash. The duplication event that resulted in creation of the  
377 two paralogs occurred prior to the radiation of the species included in the analysis. The  
378 phylogeny of the species within *Caenorhabditis* follows STEVENS *et al.* [35].

379

## 380 **Discussion**

381

382 The paralogs *spe-47* and *spe-50* have a high degree of protein sequence  
383 conservation, and they retain a very similar exonic structure (Fig 1). Further, the gene  
384 products are expressed in a nearly identical fashion within the spermatogenic tissue. Such  
385 similarity would suggest a similar function. However, the two genes are not functionally  
386 redundant, as the *spe-50(zq26)* mutation did not phenocopy its homologous *spe-47(hc198)*  
387 mutation in suppressing *spe-27(it132ts)* sterility. Also, a strain with knockout mutations in  
388 both genes had only slightly reduced fertility. Hypothetically, genes have multiple selection  
389 pressures acting on their function, and these pressures may act in opposition, constraining  
390 sequence evolution [36]. After a gene duplication event, the paralogs are thought to  
391 undergo functional divergence to satisfy different selective pressures with opposing effects  
392 on sequence evolution. Thus, true functionally redundant paralogs are very rare [36]. The  
393 duplication event that gave rise to *spe-47* and *spe-50* occurred early in the radiation of the  
394 genus (Fig 6), so the two paralogs have had ample time to evolve in response to different  
395 selection pressures.

396           However, the *spe-47* and *spe-50* genes do show a phenotype when the knockout  
397 mutations are combined in a triple mutant strain with *him-8(e1489)*. Fertility in the triple  
398 mutant strain is dramatically reduced due to a sperm defect. HIM-8 is a C2H2 zinc-finger  
399 protein that binds to the pairing center of the X-chromosome and initiates the pairing and  
400 synapsis of the X chromosome homologs [37]; *him-8* mutants show high levels of X-  
401 chromosome nondisjunction leading to increased rates of male production. HIM-8 protein  
402 binds to specific short sequences concentrated in the pairing centers, but these binding  
403 sequences are present at other sites on the X-chromosome and on the autosomes [38].  
404 Thus, it is not surprising that HIM-8 protein is also bound more diffusely at other sites on  
405 the X chromosome and the autosomes [39]. Further, mutations in *him-8* can suppress the  
406 defects associated with hypomorphic mutations in *egl-13*, *pop-1*, *sptf-3*, and *lin-39*, each  
407 encoding a transcription factor [40]. The *him-8* mutations suppress only those  
408 transcription factor mutations that affect the DNA binding domains, prompting the  
409 hypothesis that HIM-8 also has a chromatin remodeling function that affects gene  
410 expression [40].

411           If the interaction of *him-8* with *spe-47* and *spe-50* is due to the chromatin remodeling  
412 role for HIM-8 protein, then it might be that the *him-8* mutation is altering the expression of  
413 other genes, one or more of which has a more direct interaction with *spe-47* and *spe-50*.  
414 We could not identify a sperm defect for the *spe-47; spe-50; him-8* triple mutants other than  
415 there were more sperm in the reproductive tract than fertilized eggs produced, suggesting  
416 a defect in fusion with the oocytes. SPE-47 localizes to the fibrous body-membranous  
417 organelle complexes [FB-MOs; 18], and by its colocalization with SPE-47, so does SPE-50.  
418 These complexes are involved in many aspects of sperm development, from acting as

419 vehicles for MSP transport during the meiotic divisions to the remodeling of the spermatid  
420 during its transformation to an active spermatozoon. Many gene products are involved in  
421 FB-MOs: at least nine different genes have mutant phenotypes that affect FB-MO  
422 morphogenesis or function [10]. Here, our results suggest that, in combination with  
423 altered gene expression from a HIM-8 deficit, the FB-MO-associated SPE-47 and SPE-50  
424 proteins are important to the ability of sperm to fuse with passing oocytes, even though the  
425 two proteins disappear before the spermatids form.

#### 426 **Acknowledgements**

427 We are grateful to Steven L'Hernault for suggesting the complementation tests in  
428 identifying the *spe-50* gene and in providing the *spe-50* designation.

429

430 **References**

- 431
- 432 1. Ma X, Zhu Y, Li C, Xue P, Zhao Y, Chen S, et al. Characterisation of *Caenorhabditis*
- 433 *elegans* sperm transcriptome and proteome. BMC Genomics. 2014;15:168.
- 434 2. Reinke V, Gil IS, Ward S, Kazmer K. Genome-wide germline-enriched and sex-biased
- 435 expression profiles in *Caenorhabditis elegans*. Development. 2004;131(2):311-23.
- 436 3. Muhlrud PJ, Ward S. Spermiogenesis initiation in *Caenorhabditis elegans* Involves a
- 437 casein kinase 1 encoded by the *spe-6* gene. Genetics. 2002;161(1):143-55.
- 438 4. Nelson GA, Ward S. Vesicle fusion, pseudopod extension and amoeboid motility are
- 439 induced in nematode spermatids by the ionophore monensin. Cell. 1980;19(2):457-64.
- 440 5. Ward S, Hogan E, Nelson GA. The initiation of spermiogenesis in the nematode
- 441 *Caenorhabditis elegans*. Dev Biol. 1983;98(1):70-9.
- 442 6. Bandyopadhyay J, Lee J, Lee J, Lee JI, Yu JR, Jee C, et al. Calcineurin, a
- 443 calcium/calmodulin-dependent protein phosphatase, is involved in movement, fertility, egg
- 444 laying, and growth in *Caenorhabditis elegans*. Mol Biol Cell. 2002;13(9):3281-93.
- 445 7. L'Hernault SW. Spermatogenesis. In: Riddle DL, Blumenthal T, Meyer BJ, Priess JR,
- 446 editors. *C elegans* II. Cold Spring Harbor, NY USA: Cold Spring Harbor Laboratory Press;
- 447 1997. p. 271-94.
- 448 8. Washington NL, Ward S. FER-1 regulates Ca<sup>2+</sup>-mediated membrane fusion during *C.*
- 449 *elegans* spermatogenesis. J Cell Sci. 2006;119(Pt 12):2552-62.
- 450 9. Liu Z, Wang B, He R, Zhao Y, Miao L. Calcium signaling and the MAPK cascade are
- 451 required for sperm activation in *Caenorhabditis elegans*. Biochimica et biophysica acta.
- 452 2014;1843(2):299-308.

- 453 10. L'Hernault SW. Spermatogenesis. WormBook. 2006:1-14. Epub 2007/12/01. doi:  
454 10.1895/wormbook.1.85.1. PubMed PMID: 18050478; PubMed Central PMCID:  
455 PMCPMC4781361.
- 456 11. Smith JR, Stanfield GM. TRY-5 is a sperm-activating protease in *Caenorhabditis elegans*  
457 seminal fluid. PLoS Genet. 2011;7(11):e1002375.
- 458 12. Fenker KE, Hansen AA, Chong CA, Jud MC, Duffy BA, Norton JP, et al. SLC6 family  
459 transporter SNF-10 is required for protease-mediated activation of sperm motility in *C. elegans*.  
460 Dev Biol. 2014;393(1):171-82.
- 461 13. Ellis RE, Stanfield GM. The regulation of spermatogenesis and sperm function in  
462 nematodes. Semin Cell Dev Biol. 2014;29:17-30. Epub 2014/04/11. doi:  
463 10.1016/j.semcdb.2014.04.005. PubMed PMID: 24718317; PubMed Central PMCID:  
464 PMCPMC4082717.
- 465 14. Krauchunas AR, Mendez E, Ni JZ, Druzhinina M, Mulia A, Parry J, et al. *spe-43* is  
466 required for sperm activation in *C. elegans*. Dev Biol. 2018;436(2):75-83.
- 467 15. Muhrad PJ, Clark JN, Nasri U, Sullivan NG, LaMunyon CW. SPE-8, a protein-tyrosine  
468 kinase, localizes to the spermatid cell membrane through interaction with other members of the  
469 SPE-8 group spermatid activation signaling pathway in *C. elegans*. BMC genetics. 2014;15:83.
- 470 16. Gosney R, Liao WS, LaMunyon CW. A novel function for the presenilin family member  
471 *spe-4*: inhibition of spermatid activation in *Caenorhabditis elegans*. BMC Dev Biol. 2008;8:44.
- 472 17. Liao WS, Nasri U, Elmatari D, Rothman J, LaMunyon CW. Premature sperm activation  
473 and defective spermatogenesis caused by loss of *spe-46* function in *Caenorhabditis elegans*.  
474 PloS one. 2013;8(3).

- 475 18. LaMunyon CW, Nasri U, Sullivan NG, Shaw MA, Prajapati G, Christensen M, et al. A  
476 new player in the spermiogenesis pathway of *Caenorhabditis elegans*. *Genetics*.  
477 2015;201(3):1103-16. doi: 10.1534/genetics.115.181172.
- 478 19. Brenner S. The genetics of *Caenorhabditis elegans*. *Genetics*. 1974;77(1):71-94. Epub  
479 1974/05/01. PubMed PMID: 4366476; PubMed Central PMCID: PMCPMC1213120.
- 480 20. Vallin E, Gallagher J, Granger L, Martin E, Beloungue J, Maurizio J, et al. A genome-  
481 wide collection of Mos1 transposon insertion mutants for the *C. elegans* research community.  
482 PLOS ONE. 2012;7(2):e30482.
- 483 21. Arribere JA, Bell RT, Fu BXH, Artiles KL, Hartman PS, Fire AZ. Efficient marker-free  
484 recovery of custom genetic modifications with CRISPR/Cas9 in *Caenorhabditis elegans*.  
485 *Genetics*. 2014;198(3):837-46. doi: 10.1534/genetics.114.169730.
- 486 22. Dickinson DJ, Ward JD, Reiner DJ, Goldstein B. Engineering the *Caenorhabditis*  
487 *elegans* genome using Cas9-triggered homologous recombination. *Nature Methods*.  
488 2013;10(10):1028-34. Epub 09/01. doi: 10.1038/nmeth.2641. PubMed PMID: 23995389.
- 489 23. Hsu PD, Scott DA, Weinstein JA, Ran FA, Konermann S, Agarwala V, et al. DNA  
490 targeting specificity of RNA-guided Cas9 nucleases. *Nature Biotechnology*. 2013;31:827-32.
- 491 24. Liang X, Potter J, Kumar S, Ravinder N, Chesnut JD. Enhanced CRISPR/Cas9-mediated  
492 precise genome editing by improved design and delivery of gRNA, Cas9 nuclease, and donor  
493 DNA. *Journal of Biotechnology*. 2017;241:136-46.
- 494 25. Kohler S, Wojcik M, Xu K, Dernburg AF. Superresolution microscopy reveals the three-  
495 dimensional organization of meiotic chromosome axes in intact *Caenorhabditis elegans* tissue.  
496 *Proc Natl Acad Sci U S A*. 2017;114(24):E4734-E43.

- 497 26. Frokjaer-Jensen C, Davis MW, Ailion M, Jorgensen EM. Improved Mos1-mediated  
498 transgenesis in *C. elegans*. *Nature Methods*. 2012;9(2):117-8.
- 499 27. Frokjaer-Jensen C, Davis MW, Hopkins CE, Newman BJ, Thummel JM, Olesen SP, et  
500 al. Single-copy insertion of transgenes in *Caenorhabditis elegans*. *Nat Genet*. 2008;40(11):1375-  
501 83.
- 502 28. Hobert O. PCR fusion-based approach to create reporter gene constructs for expression  
503 analysis in transgenic *C. elegans*. *Biotechniques*. 2002;32(4):728-30.
- 504 29. Machaca K, DeFelice LJ, L'Hernault SW. A novel chloride channel localizes to  
505 *Caenorhabditis elegans* spermatids and chloride channel blockers induce spermatid  
506 differentiation. *Dev Biol*. 1996;176(1):1-16.
- 507 30. Ronquist F, Huelsenbeck JP. MrBayes 3: Bayesian phylogenetic inference under mixed  
508 models. *Bioinformatics*. 2003;19(12):1572-4.
- 509 31. Sigurdson DC, Spanier GJ, Herman RK. *Caenorhabditis elegans* deficiency mapping.  
510 *Genetics*. 1984;108(2):331-435.
- 511 32. Minniti AN, Sadler C, Ward S. Genetic and molecular analysis of *spe-27*, a gene required  
512 for spermiogenesis in *Caenorhabditis elegans* hermaphrodites. *Genetics*. 1996;143:213-23.
- 513 33. Phillips CM, Wong C, Bhalla N, Carlton PM, Weiser P, Meneely PM, et al. HIM-8 binds  
514 to the X chromosome pairing center and mediates chromosome-specific meiotic synapsis. *Cell*.  
515 2005;123(6):1051-63. Epub 2005/12/20. doi: 10.1016/j.cell.2005.09.035. PubMed PMID:  
516 16360035; PubMed Central PMCID: PMC4435792.
- 517 34. L'Hernault SW, Roberts TM. Cell biology of nematode sperm. In: Epstein HF, Shakes D,  
518 editors. *Caenorhabditis elegans Modern Biological Analysis of an Organism*. 48. San Diego:  
519 Academic Press, Inc.; 1995. p. 273-99.



- 520 35. Stevens L, Félix M-A, Beltran T, Braendle C, Caurcel C, Fausett S, et al. Comparative  
521 genomics of 10 new *Caenorhabditis* species. *Evolution Letters*. 2019;3(2):217-36.
- 522 36. Soria PS, McGary KL, Rokas A. Functional divergence for every paralog. *Mol Biol Evol*.  
523 2014;31(4):984-92.
- 524 37. Phillips CM, Wong C, Bhalla N, Carlton PM, Weiser P, Meneely PM, et al. HIM-8 binds  
525 to the X chromosome pairing center and mediates chromosome-specific meiotic synapsis. *Cell*.  
526 2005;123(6):1051-63.
- 527 38. Phillips CM, Meng X, Zhang L, Chretien JH, Urnov FD, Dernburg AF. Identification of  
528 chromosome sequence motifs that mediate meiotic pairing and synapsis in *C. elegans*. *Nat Cell*  
529 *Biol*. 2009;11(8):934-42.
- 530 39. Nabeshima K, Mlynarczyk-Evans S, Villeneuve AM. Chromosome painting reveals  
531 asynaptic full alignment of homologs and HIM-8-dependent remodeling of X chromosome  
532 territories during *Caenorhabditis elegans* meiosis. *PLoS Genet*. 2011;7(8):e1002231.
- 533 40. Sun H, Nelms BL, Sleiman SF, Chamberlin HM, Hanna-Rose W. Modulation of  
534 *Caenorhabditis elegans* transcription factor activity by HIM-8 and the related Zinc-Finger ZIM  
535 proteins. *Genetics*. 2007;177(2):1221-6.
- 536

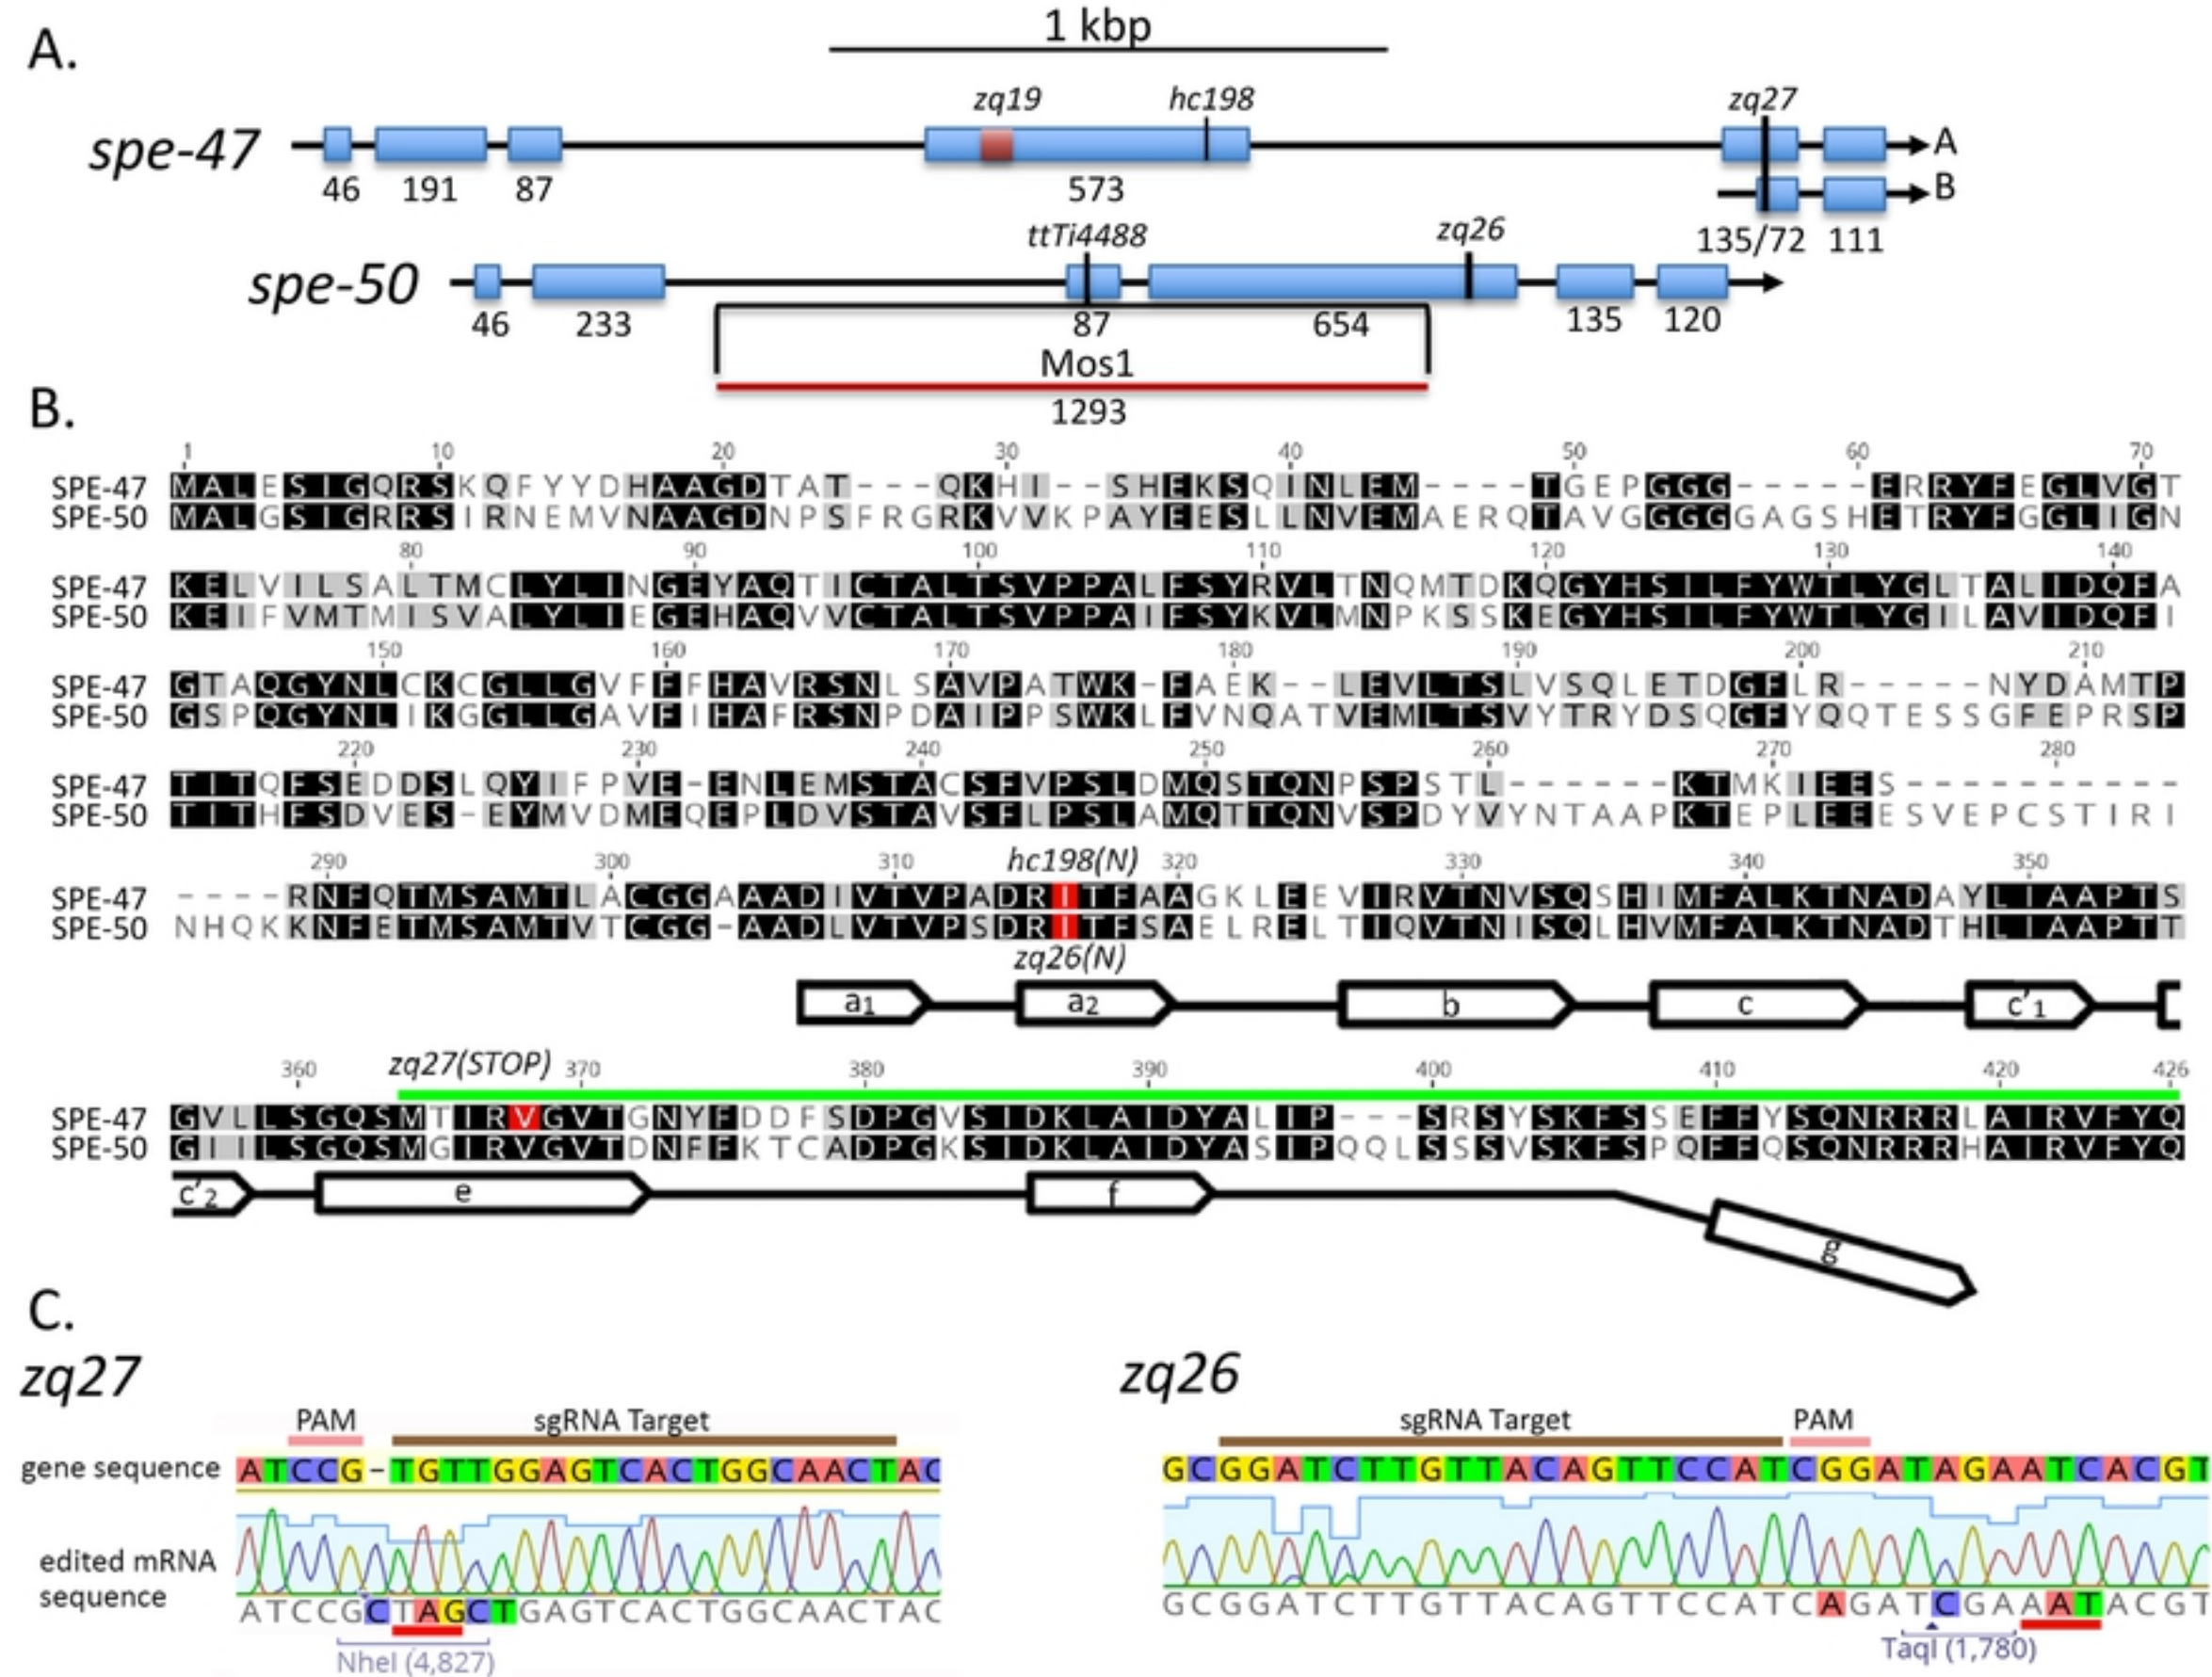

Figure 1

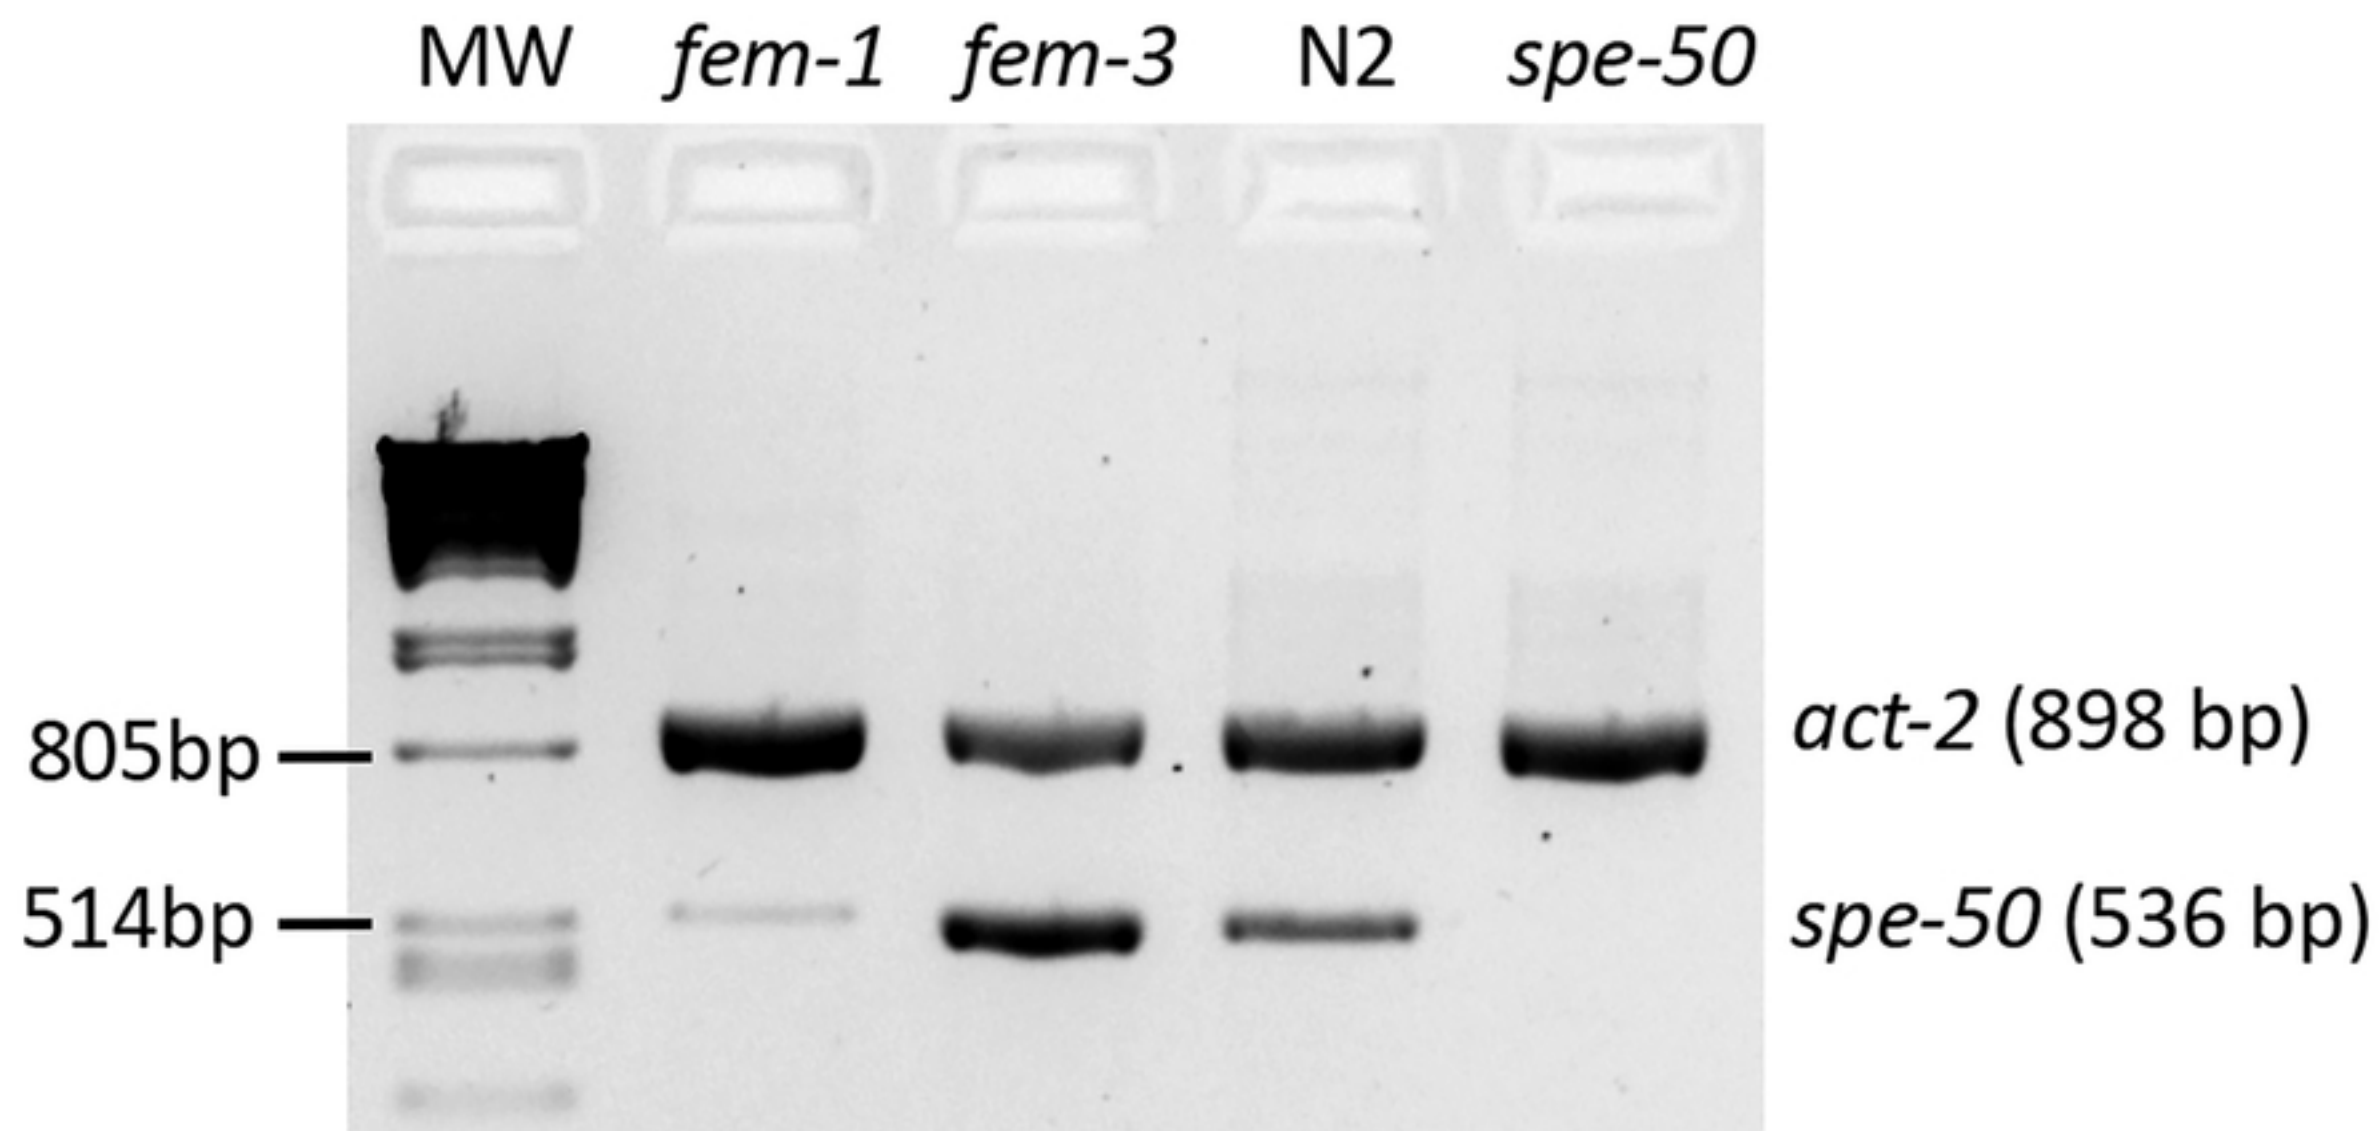

Figure 2



### A. Double Reporter Strain

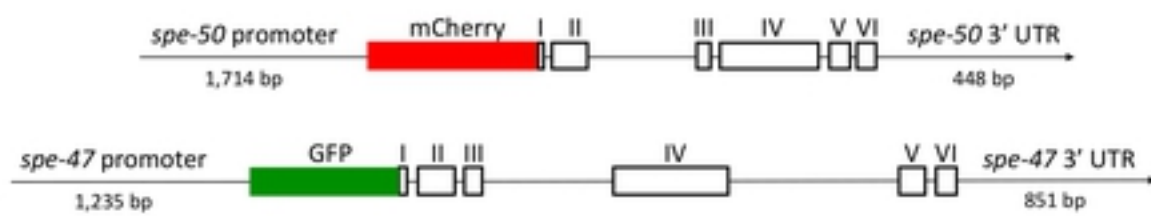

bioRxiv preprint doi: <https://doi.org/10.1101/2020.03.13.990366>; this version posted March 17, 2020. The copyright holder for this preprint (which was not certified by peer review) is the author/funder, who has granted bioRxiv a license to display the preprint in perpetuity. It is made available under aCC-BY 4.0 International license.

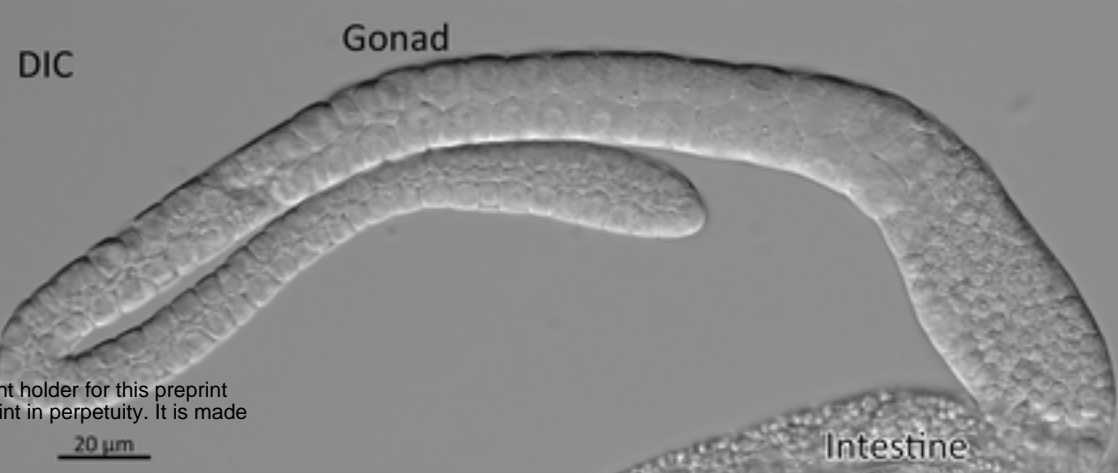

mCherry

Hoechst 33342

GFP

RGB Merge

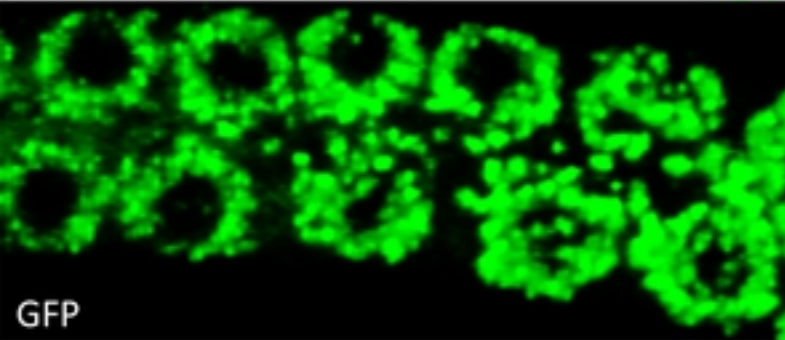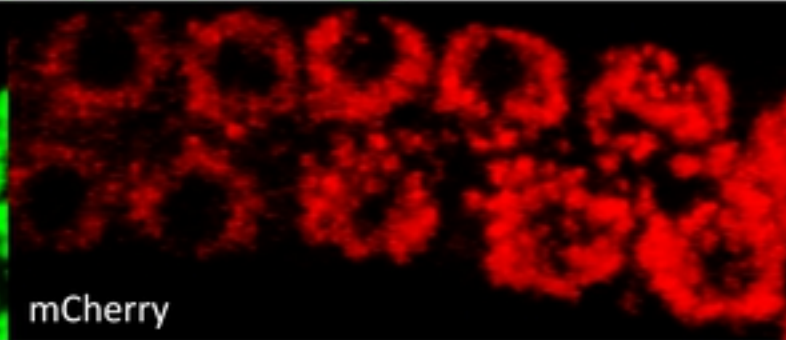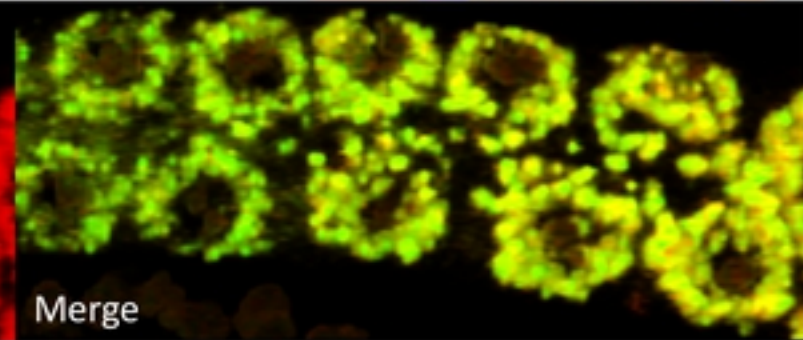

### B. Unlabeled Control Strain

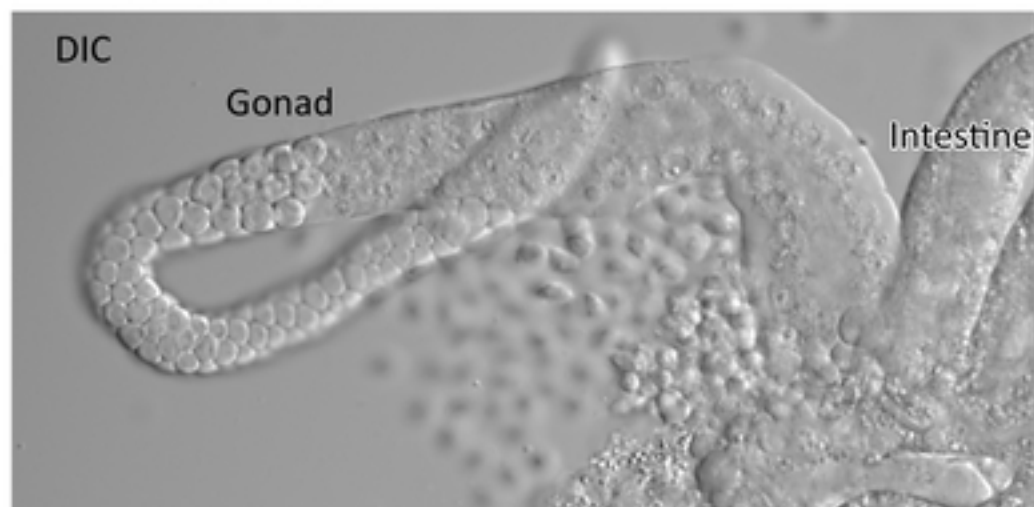

RGB Merge

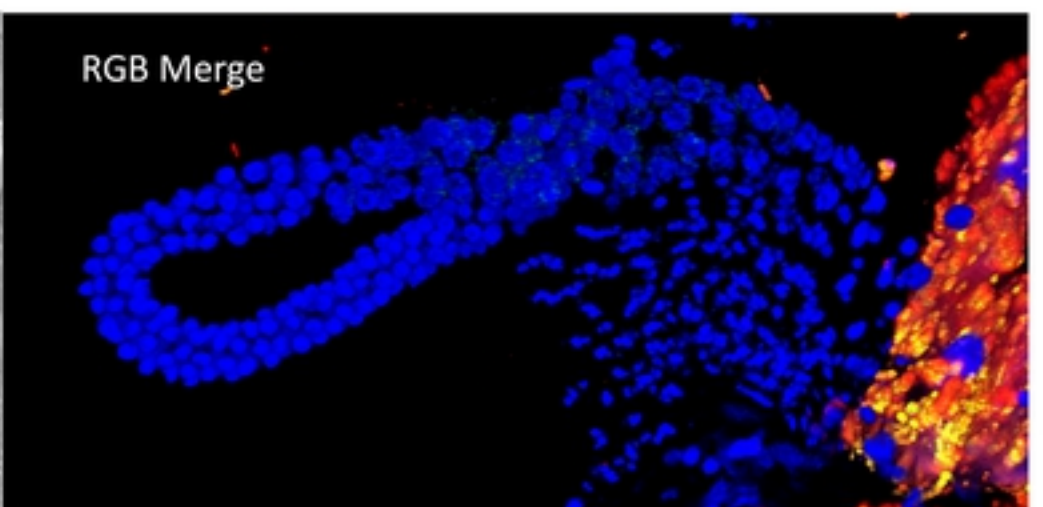

Figure 3

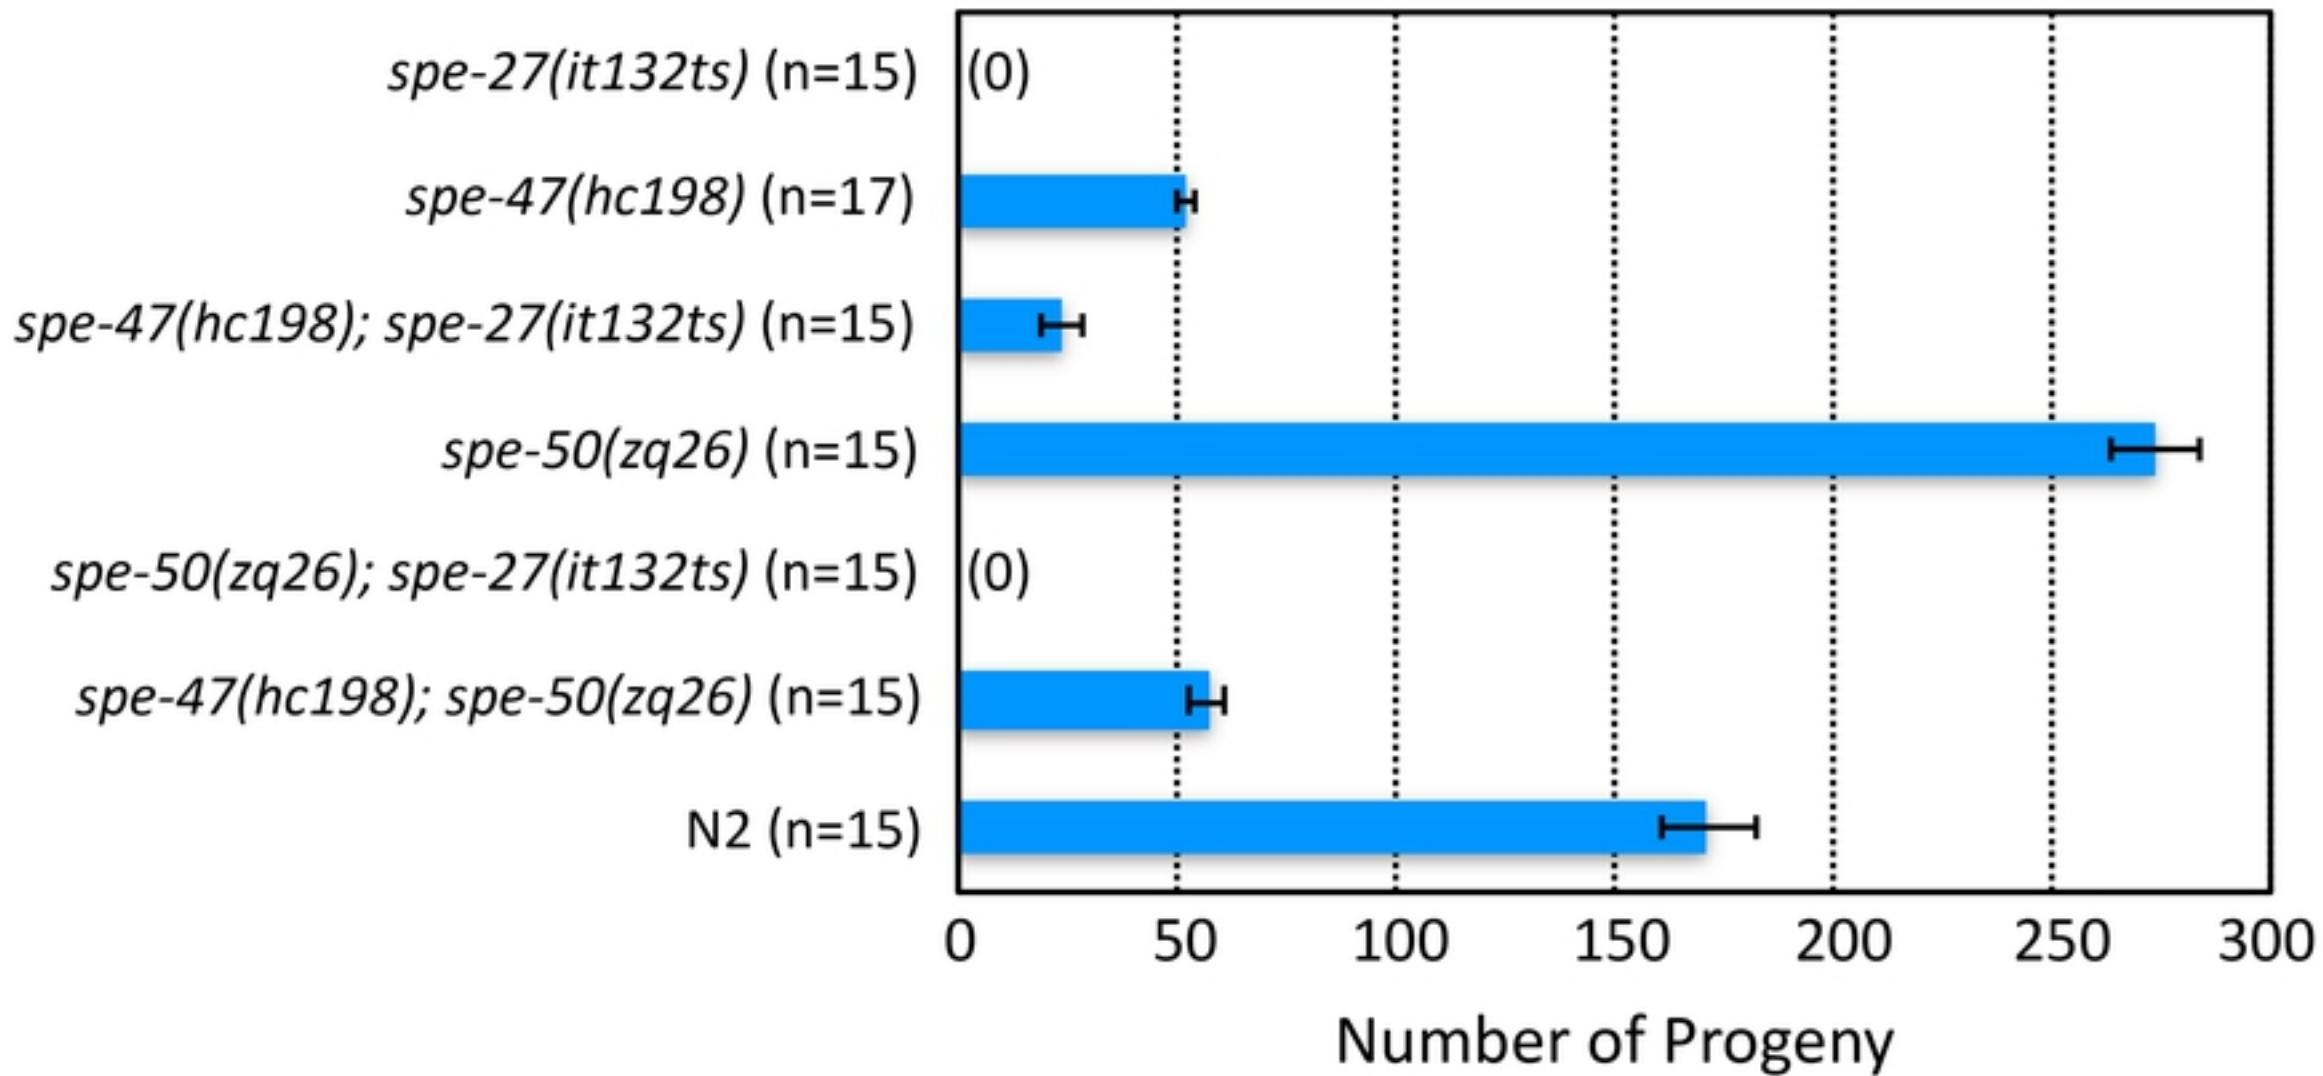

Figure 4

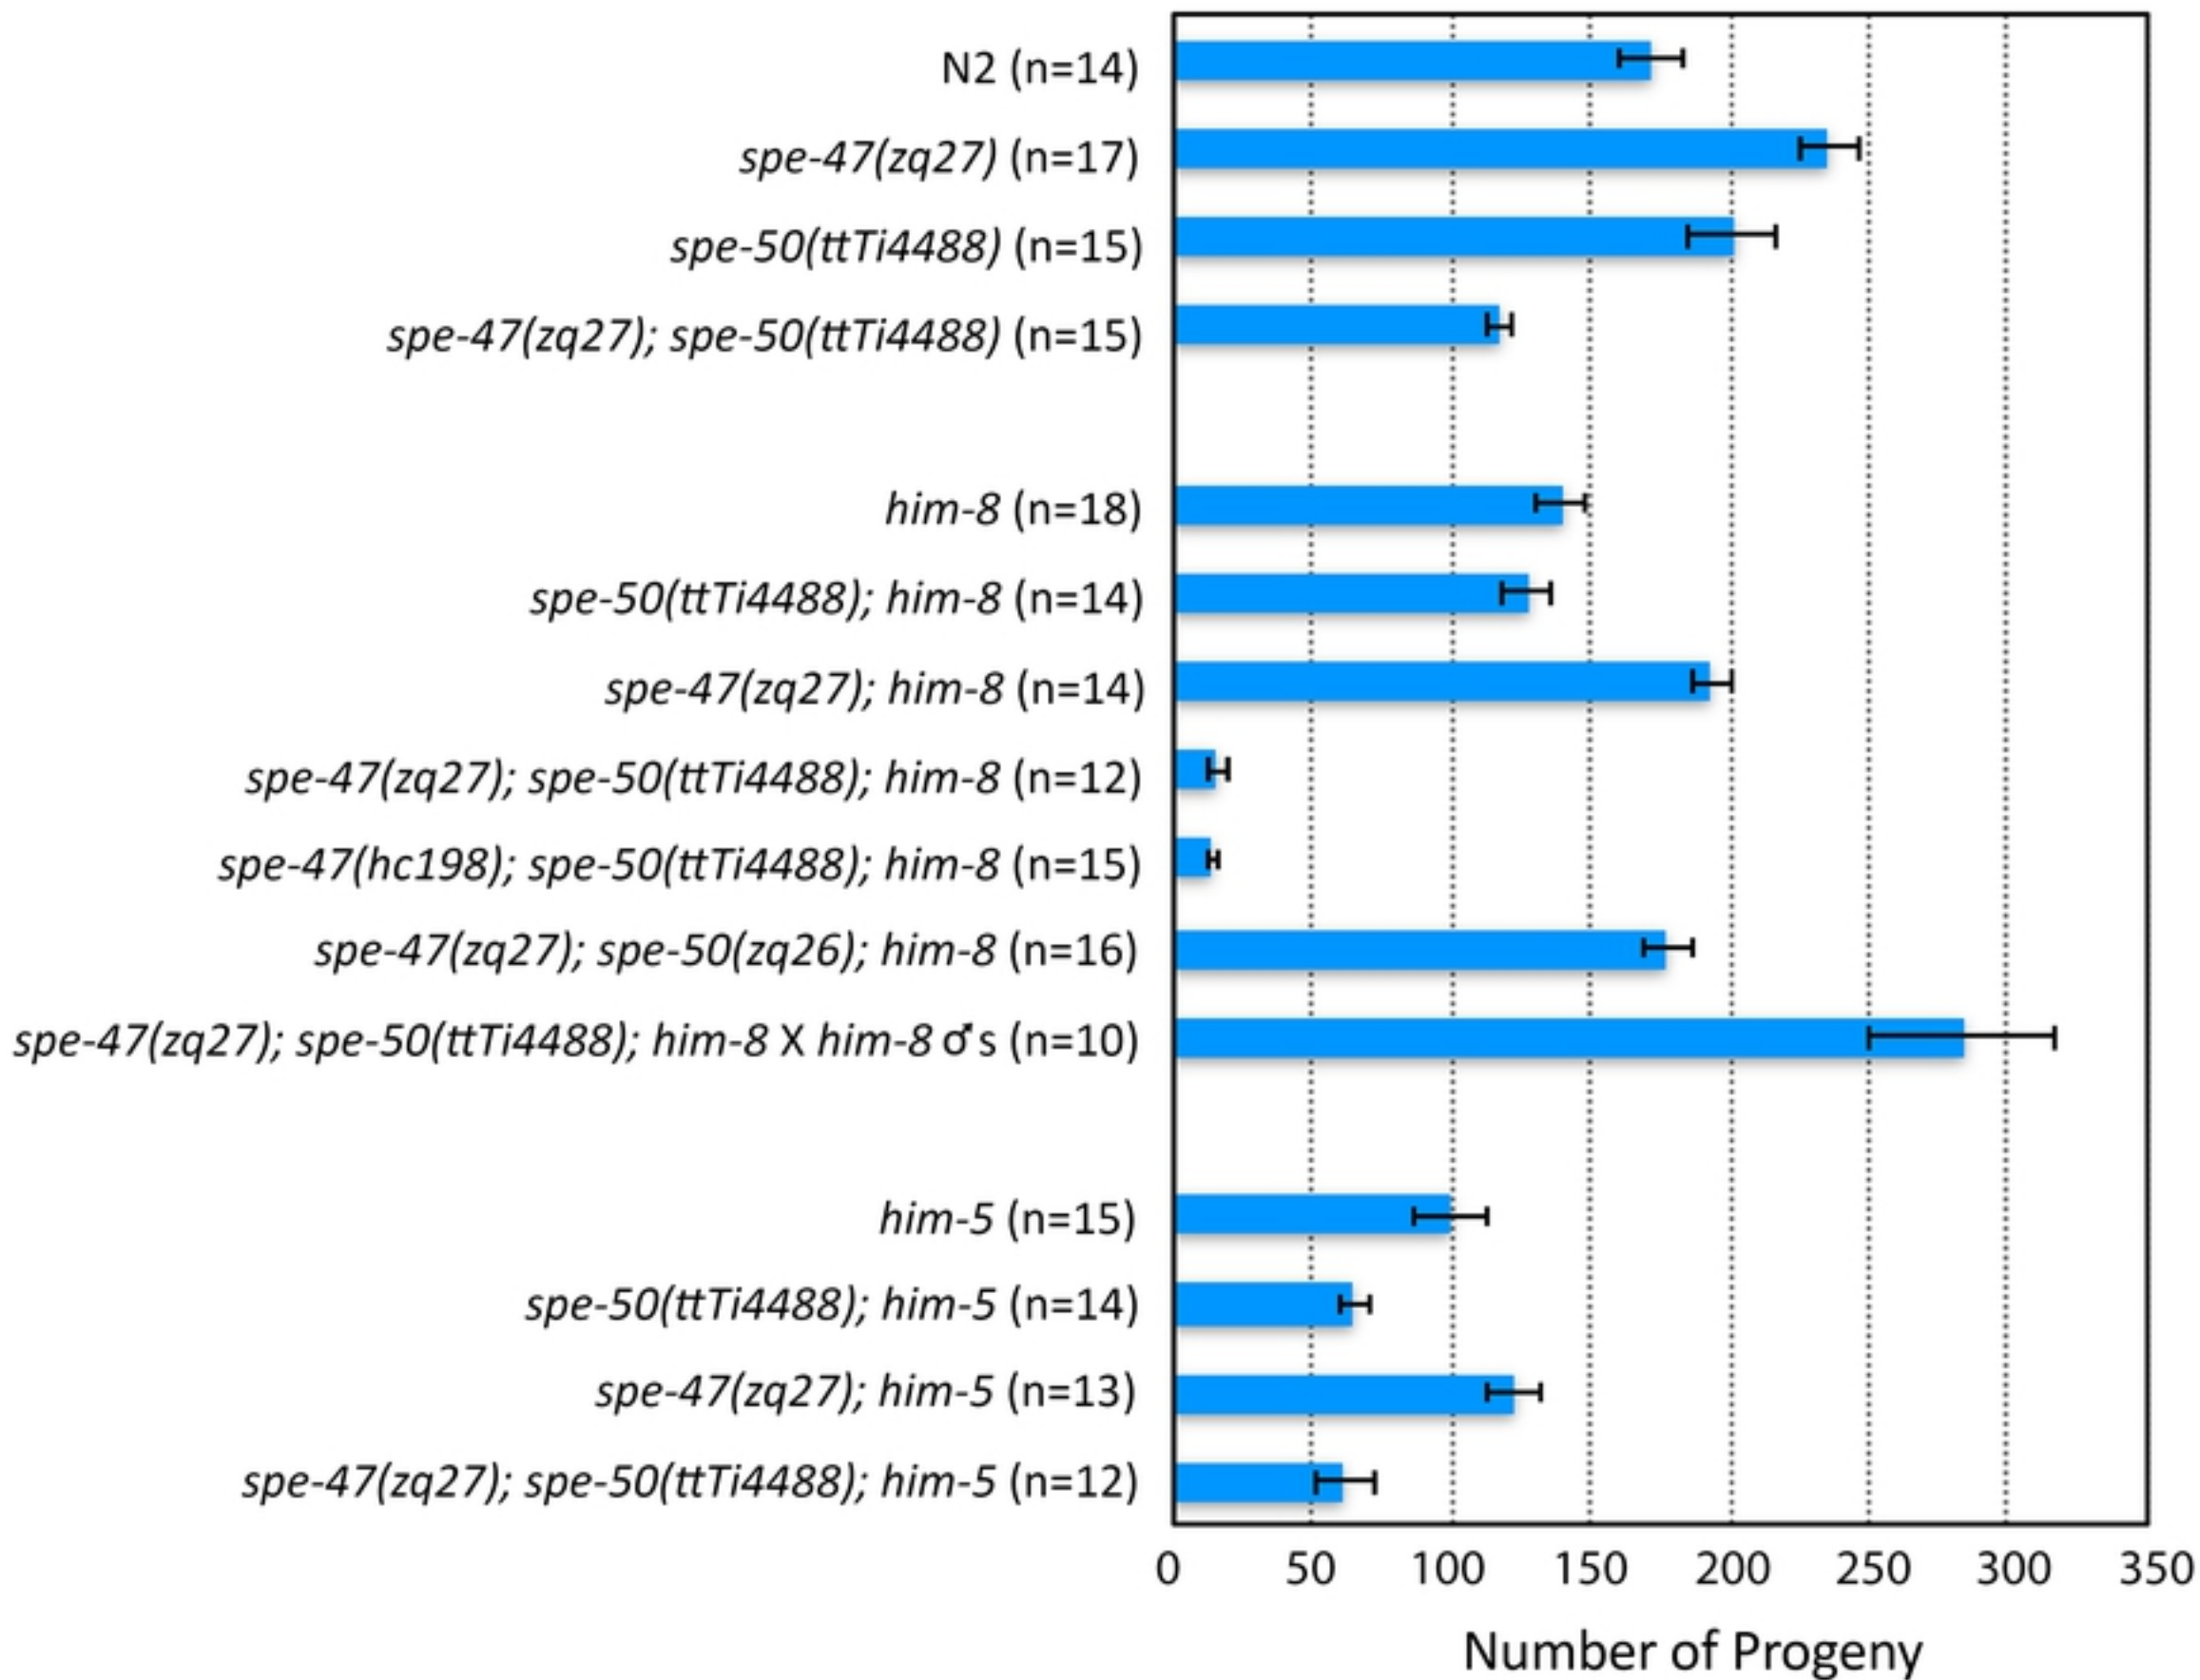

Figure 5
